# Supplementary material
Source: publisher figshare collection journal article supplement (https://plos.figshare.com/articles/dataset/_/122578)
Supplement: Supplementary file [file 1]

| <b>variable</b>                 | <b>description</b>                                      |
|---------------------------------|---------------------------------------------------------|
| $ILR(t)$                        | IL-1 receptor (normed)                                  |
| $ILRc(t)$                       | IL-1 receptor complex (normed)                          |
| $IKK(t)$                        | unphosphorylated IKK (normed)                           |
| $IKKp(t)$                       | phosphorylated IKK (normed)                             |
| $PP2A(t)$                       | active PP2A (normed)                                    |
| $I\kappa B\alpha NF\kappa B(t)$ | cytosolic I $\kappa$ B $\alpha$ -NF- $\kappa$ B complex |
| $I\kappa B\alpha(t)$            | free cytosolic I $\kappa$ B $\alpha$                    |
| $I\kappa B\alpha_n(t)$          | free nuclear I $\kappa$ B $\alpha$                      |
| $NF\kappa B_n(t)$               | free nuclear NF- $\kappa$ B                             |
| $I\kappa B\alpha_t(t)$          | I $\kappa$ B $\alpha$ mRNA                              |
| <b>input</b>                    |                                                         |
| $il(t)$                         | interleukin-1 $\beta$                                   |
| $uv(t)$                         | UVB irradiation                                         |
| $mg(t)$                         | MG132                                                   |
| $chx(t)$                        | cycloheximide                                           |
