# Supplementary material
Source: publisher figshare collection journal article supplement (https://plos.figshare.com/articles/dataset/_/122578)
Supplement: Supplementary file [file 1]

| Name         | Description                                                 | Value  | Unit                             | Fit range                |
|--------------|-------------------------------------------------------------|--------|----------------------------------|--------------------------|
| $k_{ilr}$    | ILR turnover                                                | 1.9e-5 | s <sup>-1</sup>                  | [9.3e-6, 2.8e-5]         |
| $k_a$        | ILR complex formation                                       | 6.5    | μM <sup>-1</sup> s <sup>-1</sup> | -                        |
| $k_i$        | ILR complex<br>internalisation                              | 0.0032 | s <sup>-1</sup>                  | -                        |
| $k_p$        | IKK phosphorylation                                         | 0.095  | s <sup>-1</sup>                  | [0, 0.095]               |
| $k_{dp}$     | IKK dephosphorylation                                       | 7.1e-4 | s <sup>-1</sup>                  | -                        |
| $K_m$        | Michaelis constant for IKK<br>dephosphorylation             | 0.014  | -                                | -                        |
| $k_{uv}$     | UV-induced PP2A<br>deactivation                             | 3.6e-4 | s <sup>-1</sup>                  | -                        |
| $a_1$        | IκBα-NFκB association                                       | 1      | μM <sup>-1</sup> s <sup>-1</sup> | [0.3, 1]                 |
| $a_2$        | degradation of free IκBα                                    | 0.015  | s <sup>-1</sup>                  | [0, 0.8]                 |
| $a_3$        | degradation of NF-κB-<br>bound IκBα                         | 0.014  | s <sup>-1</sup>                  | [0, 0.8]                 |
| $c_{1a}$     | IκBα mRNA transcription                                     | 9.2e-7 | s <sup>-1</sup>                  | [0, 9.2e-7]              |
| $c_{3a}$     | IκBα mRNA degradation                                       | 6.0e-4 | s <sup>-1</sup>                  | [2.6e-4, 7.7e-4]         |
| $c_{4a}$     | IκBα translation                                            | 0.5    | s <sup>-1</sup>                  | [0, 0.5]                 |
| $c_{5a}$     | IKK-independent<br>degradation of free IκBα                 | 7.5e-4 | s <sup>-1</sup>                  | [5.8e-4, 2e-3]           |
| $i_{1a}$     | IκBα nuclear import                                         | 6.7e-4 | s <sup>-1</sup>                  | [1.9e-4, 6.7e-4]         |
| $e_{1a}$     | IκBα nuclear export                                         | 3.4e-4 | s <sup>-1</sup>                  | calculated as $i_{1a}/2$ |
| $uvinh$      | UVB-induced translational<br>inhibition                     | 0.92   | -                                | [0, 1]                   |
| $c_{6a}$     | constitutive IκBα degra-<br>dation in IκBα-NF-κB<br>complex | 2.2e-5 | s <sup>-1</sup>                  | fix                      |
| $k_{pconst}$ | constitutive IKKβ<br>phosphorylation                        | 2.1e-6 | s <sup>-1</sup>                  | -                        |
| $k_v$        | volume ratio cytoplasm /<br>nucleus                         | 2.9    | -                                | fix                      |
| $nfkb_{tot}$ | concentration of NF-κB if<br>completely in the<br>cytoplasm | 0.067  | μM                               | fix                      |
| $volume$     | total cell volume                                           | 2      | pl                               | fix                      |
| $s_{IKK}$    | IKK scaling factor                                          | 0.98   | -                                | -                        |
| $s_{IκBα}$   | IκBα scaling factor                                         | 14.6   | -                                | -                        |
| $s_{NFκB1}$  | NF-κB scaling factor (IL-1<br>stimulation)                  | 8.5    | -                                | -                        |
| $s_{NFκB2}$  | NF-κB scaling factor<br>(IL-1+UVB stimulation)              | 8.1    | -                                | -                        |
